# Supplementary material
Source: PubMed Central journal article supplement (PMC2580782)

Supplementary Figure 1

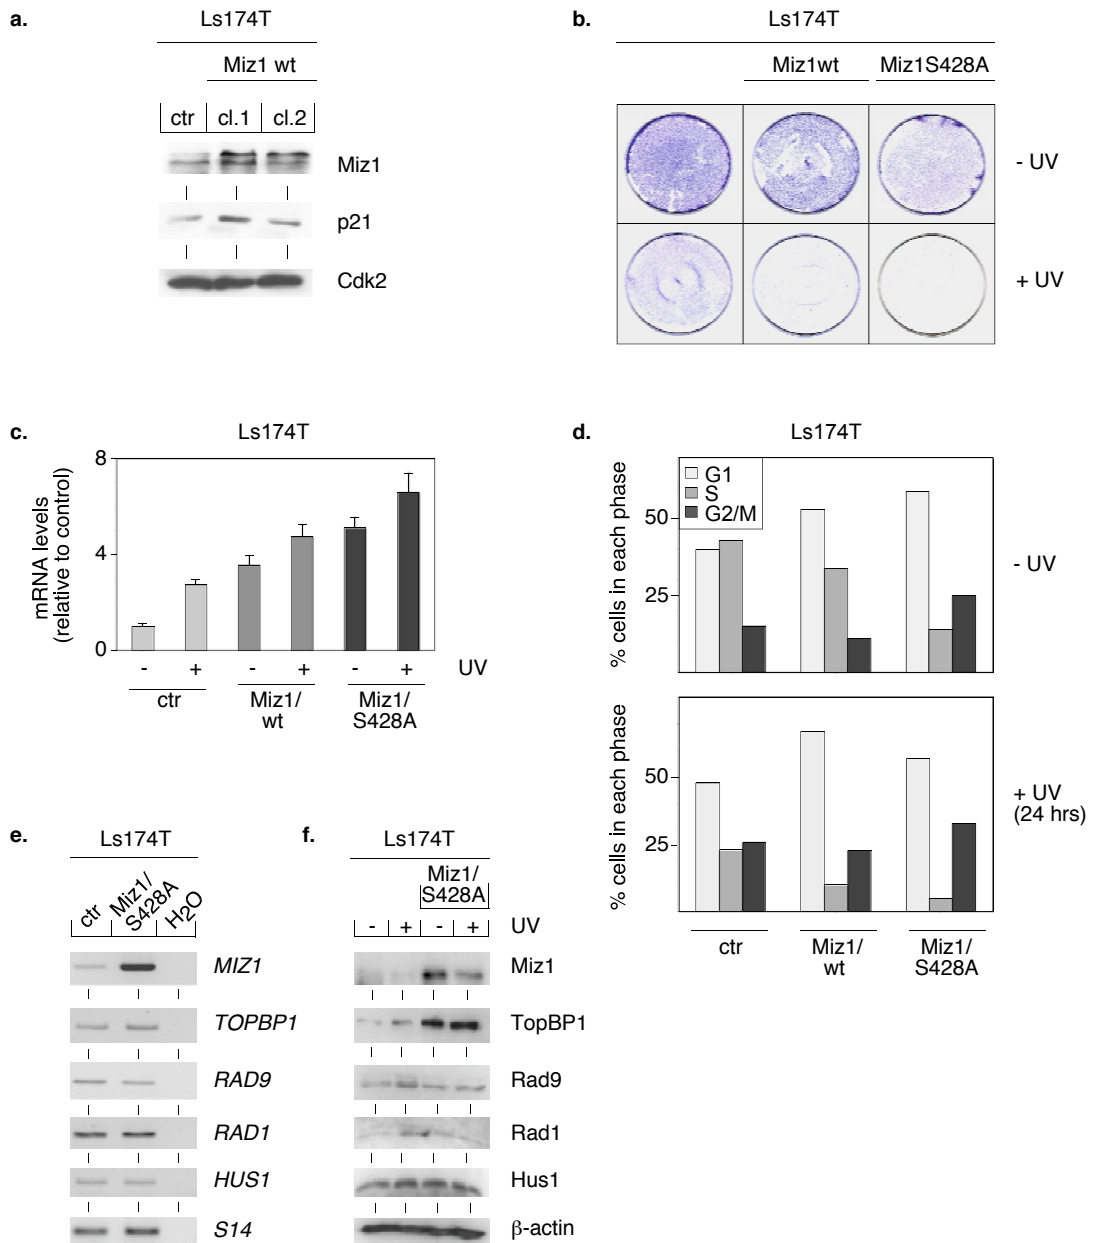

Supplement: emboj2008200s1.pdf [file emboj2008200s1.pdf]

Supplementary Figure 2

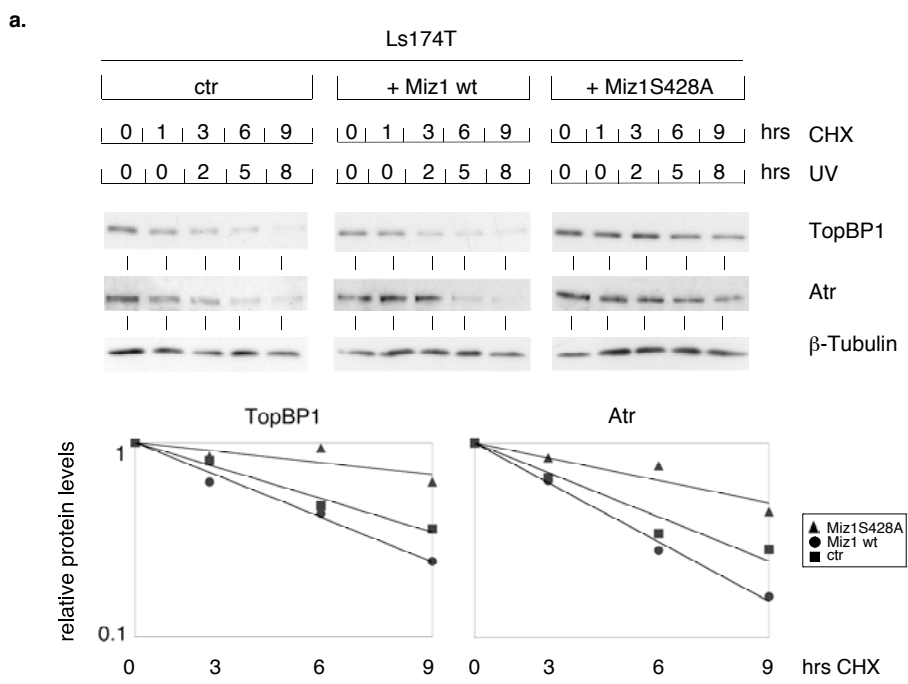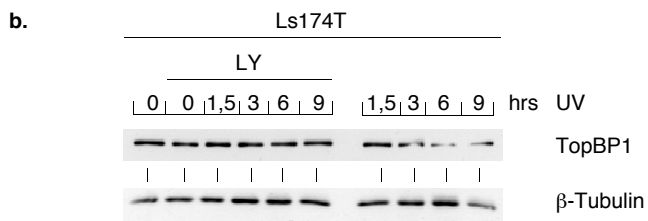

Supplement: emboj2008200s2.pdf [file emboj2008200s2.pdf]

Supplementary Figure 3

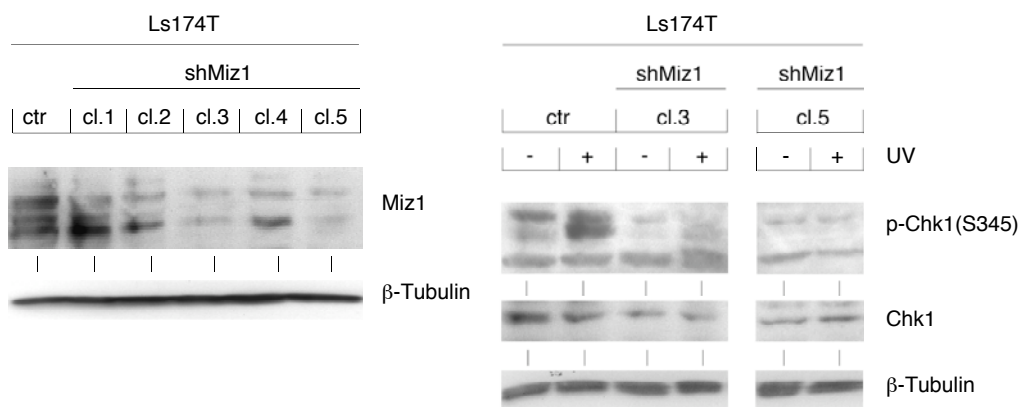

Supplement: emboj2008200s3.pdf [file emboj2008200s3.pdf]

Supplementary Figure 4

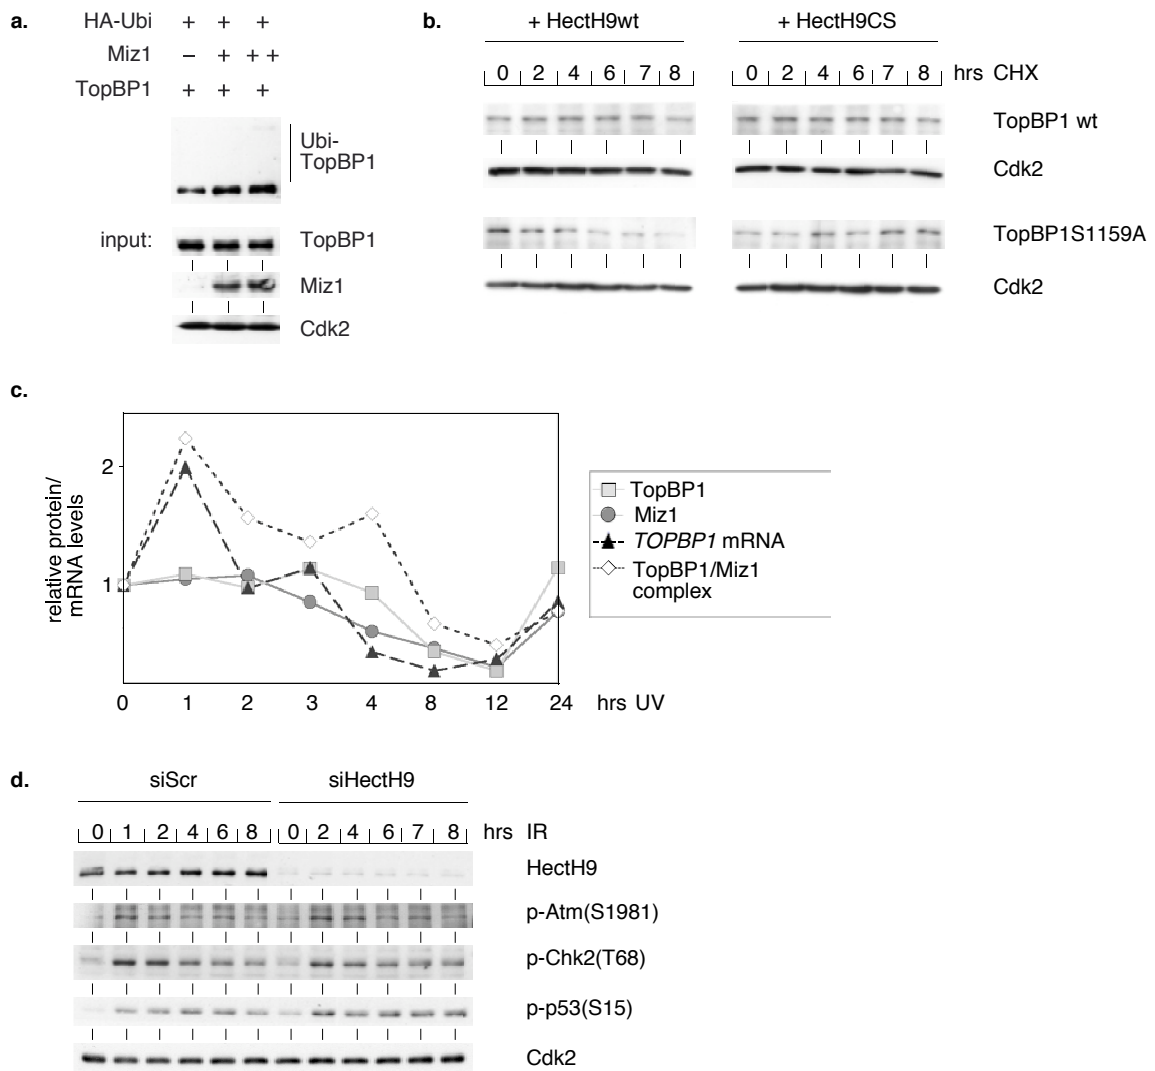

Supplement: emboj2008200s4.pdf [file emboj2008200s4.pdf]

Supplementary Figure 5

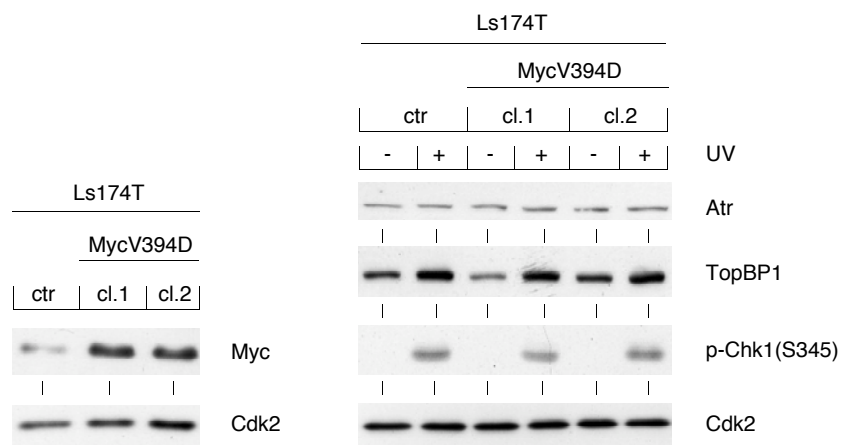

Supplement: emboj2008200s5.pdf [file emboj2008200s5.pdf]

Supplementary Figure 6

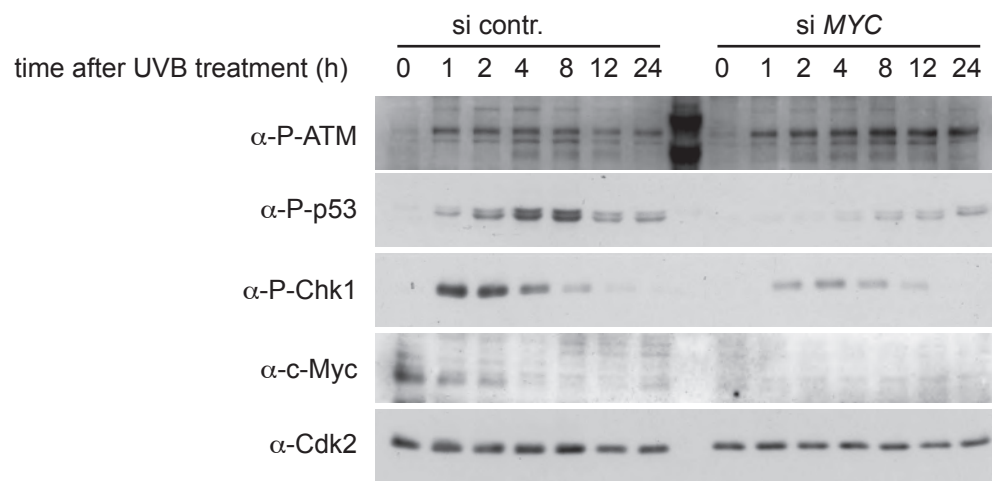

Supplement: emboj2008200s6.pdf [file emboj2008200s6.pdf]
